# Supplementary material
Source: PubMed Central journal article supplement (PMC5625923)
Supplement: pnas.1710235114.sapp.pdf [file pnas.1710235114.sapp.pdf]

## Supporting Information Appendix

*Supplemental Table 1.*

Antibiotic classes and drugs administered in this study.

| <b>Antibiotic Classes</b> | <b>Drug</b>                                                                                          |
|---------------------------|------------------------------------------------------------------------------------------------------|
| Aminoglycosides           | Tobramycin, Gentamicin, Amikacin                                                                     |
| Carbapenems               | Meropenem, Ertapenem, Imipenem, Doripenem                                                            |
| Cephalosporins            | 1 <sup>st</sup> generation: Cephalexin, Cefazolin, Cefalexin, Cefadroxil,                            |
|                           | 2 <sup>nd</sup> generation: Cefitin, Cefuroxime, Cefoxitin                                           |
|                           | 3 <sup>rd</sup> generation: Cefditoren, Cefixime, Cefpodoxime,<br>Ceftriaxone, Cefdinir, Ceftazidime |
|                           | 4 <sup>th</sup> generation: Cefepime                                                                 |
| Glycopeptides             | Vancomycin                                                                                           |
| Lincosamides              | Clindamycin                                                                                          |
| Macrolides                | Azithromycin, Erythromycin, Clarithromycin                                                           |
| Nitrofurans               | Nitrofurantoin                                                                                       |
| Nitroimidazoles           | Metronidazole                                                                                        |
| Oxazolidinones            | Linezolid                                                                                            |
| Penicillins               | Ampicillin, Amoxicillin, Nafcillin, Piperacillin, Penicillin                                         |
| Penicillin Combinations   | Amoxicillin-Clavulanate, Ampicillin-Sulbactam, Piperacillin-Tazobactam                               |
| Quinolones                | Liprofloxacin, Levofloxacin, Moxifloxacin, Ciprofloxacin                                             |
| Sulfonamides              | Trimethoprim-Sulfamethoxazole                                                                        |
| Tetracyclines             | Doxycycline, Tetracycline, Declomycin                                                                |
| Lipopeptide               | Daptomycin                                                                                           |
| Triazoles                 | Fluconazole, Diflucan                                                                                |
| Monobactams               | Aztreonam                                                                                            |
| Rifampicin                | Rifampin                                                                                             |

*Supplemental Table 2*

a. Number of patients exposed to each antibiotic class in this study.

| Number of participants  |     |
|-------------------------|-----|
| Cephalosporins          | 124 |
| Quinolones              | 120 |
| Penicillin Combinations | 56  |
| Glycopeptides           | 56  |
| Sulfonamides            | 41  |
| Aminoglycosides         | 31  |
| Penicillins             | 29  |
| Nitroimidazoles         | 24  |
| Nitrofurans             | 22  |
| Macrolides              | 17  |
| Tetracyclines           | 15  |
| Carbapenems             | 15  |
| Oxazolidinones          | 12  |
| Lincosamides            | 9   |
| Triazoles               | 7   |
| Lipopeptide             | 3   |
| Monobactams             | 2   |
| Rifampicin              | 1   |

Supplemental Table 2

b. Spectrum of activity of each antibiotic class against MDRO of interest in this study. TRUE = effective; FALSE = ineffective due to intrinsic resistance.

\* only effective against *E. faecalis*

\*\* true for piperacillin/tazobactam

\*\*\* *E. faecalis* (not *E. faecium*) is susceptible to piperacillin/tazobactam, ampicillin/sulbactam, and amoxicillin/clavulanate but not ticarcillin/clavulanic acid.

\*\*\*\* Only ceftazidime, not cefotaxime, ceftriaxone, etc.

|                      | Non-aminopenicillin penicillins | Amino-penicillins | Ureido-penicillin | Penicillin combinations |
|----------------------|---------------------------------|-------------------|-------------------|-------------------------|
| <i>P. mirabilis</i>  | TRUE                            | TRUE              | TRUE              | TRUE                    |
| <i>A. baumannii</i>  | FALSE                           | FALSE             | FALSE             | TRUE                    |
| <i>P. aeruginosa</i> | FALSE                           | FALSE             | TRUE              | TRUE**                  |
| VRE                  | TRUE *                          | TRUE              | TRUE              | TRUE***                 |
| <i>E. coli</i>       | FALSE                           | TRUE              | TRUE              | TRUE                    |
| MRSA                 | FALSE                           | FALSE             | FALSE             | FALSE                   |

|                      | Cephalosporins |         |          |         |
|----------------------|----------------|---------|----------|---------|
|                      | 1st Gen        | 2nd Gen | 3rd Gen  | 4th Gen |
| <i>P. mirabilis</i>  | TRUE           | TRUE    | TRUE     | TRUE    |
| <i>A. baumannii</i>  | FALSE          | FALSE   | TRUE     | TRUE    |
| <i>P. aeruginosa</i> | FALSE          | FALSE   | TRUE**** | TRUE    |
| VRE                  | FALSE          | FALSE   | FALSE    | FALSE   |
| <i>E. coli</i>       | TRUE           | TRUE    | TRUE     | TRUE    |
| MRSA                 | FALSE          | FALSE   | FALSE    | FALSE   |

|                      | Macrolides | Meropenem/Doripenem | Ertapenem | Imipenem |
|----------------------|------------|---------------------|-----------|----------|
| <i>P. mirabilis</i>  | FALSE      | TRUE                | TRUE      | FALSE    |
| <i>A. baumannii</i>  | FALSE      | TRUE                | FALSE     | TRUE     |
| <i>P. aeruginosa</i> | FALSE      | TRUE                | FALSE     | TRUE     |
| VRE                  | FALSE      | FALSE               | FALSE     | TRUE *   |
| <i>E. coli</i>       | FALSE      | TRUE                | TRUE      | TRUE     |
| MRSA                 | TRUE       | FALSE               | FALSE     | FALSE    |

|               | Nitrofurantoin | Glycopeptides | Aminoglycosides | Fluoroquinolones |
|---------------|----------------|---------------|-----------------|------------------|
| P. mirabilis  | FALSE          | FALSE         | TRUE            | TRUE             |
| A. baumannii  | FALSE          | FALSE         | TRUE            | TRUE             |
| P. aeruginosa | FALSE          | FALSE         | TRUE            | TRUE             |
| VRE           | TRUE           | FALSE         | TRUE            | TRUE             |
| E. coli       | TRUE           | FALSE         | TRUE            | TRUE             |
| MRSA          | TRUE           | TRUE          | TRUE            | TRUE             |

|               | Sulfonamides | Lincosamides |
|---------------|--------------|--------------|
| P. mirabilis  | TRUE         | FALSE        |
| A. baumannii  | TRUE         | FALSE        |
| P. aeruginosa | FALSE        | FALSE        |
| VRE           | FALSE        | FALSE        |
| E. coli       | TRUE         | FALSE        |
| MRSA          | TRUE         | TRUE         |

*Supplemental Table 3*

The hazard ratio of acquiring a secondary resistant organism within 30 days when a primary resistant organism is present (row name: primary organism/secondary organism), unadjusted for resident-level covariates. Species pairs that have a hazard ratio > 2 and p value < 0.05 are highlighted.

| Primary/Secondary organism                     | Hazard ratio (confidence interval; p value) |
|------------------------------------------------|---------------------------------------------|
| VRE/MRSA                                       | HR = 1.49 (CI = 0.65-3.44; p = 0.346)       |
| VRE/Acinetobacter_baumannii                    | HR = 3.64 (CI = 1.21-10.92; p = 0.021)      |
| VRE/Escherichia_coli                           | HR = 1.55 (CI = 0.51-4.67; p = 0.437)       |
| VRE/Proteus_mirabilis                          | HR = 1.39 (CI = 0.47-4.16; p = 0.551)       |
| VRE/Pseudomonas_aeruginosa                     | HR = 2.91 (CI = 0.88-9.65; p = 0.08)        |
| MRSA/VRE                                       | HR = 1.71 (CI = 0.57-5.09; p = 0.335)       |
| MRSA/Acinetobacter_baumannii                   | HR = 0.67 (CI = 0.09-5.23; p = 0.706)       |
| MRSA/Escherichia_coli                          | HR = 0.37 (CI = 0.05-2.75; p = 0.329)       |
| MRSA/Proteus_mirabilis                         | HR = 1.76 (CI = 0.59-5.25; p = 0.307)       |
| Acinetobacter_baumannii/VRE                    | HR = 2.57 (CI = 0.34-19.56; p = 0.361)      |
| Acinetobacter_baumannii/MRSA                   | HR = 0.56 (CI = 0.07-4.11; p = 0.565)       |
| Acinetobacter_baumannii/Escherichia_coli       | HR = 1.65 (CI = 0.22-12.64; p = 0.627)      |
| Acinetobacter_baumannii/Proteus_mirabilis      | HR = 7.51 (CI = 2.51-22.44; p = 0.001)      |
| Acinetobacter_baumannii/Pseudomonas_aeruginosa | HR = 1.67 (CI = 0.21-13.37; p = 0.627)      |
| Escherichia_coli/VRE                           | HR = 1.4 (CI = 0.59-3.3; p = 0.447)         |
| Escherichia_coli/MRSA                          | HR = 2.06 (CI = 1.08-3.92; p = 0.027)       |
| Escherichia_coli/Acinetobacter_baumannii       | HR = 2.43 (CI = 0.81-7.29; p = 0.115)       |
| Escherichia_coli/Proteus_mirabilis             | HR = 2.42 (CI = 1.07-5.46; p = 0.033)       |
| Escherichia_coli/Pseudomonas_aeruginosa        | HR = 2.15 (CI = 0.72-6.45; p = 0.173)       |
| Proteus_mirabilis/VRE                          | HR = 2.32 (CI = 1-5.35; p = 0.049)          |
| Proteus_mirabilis/MRSA                         | HR = 2.18 (CI = 1.13-4.2; p = 0.019)        |
| Proteus_mirabilis/Acinetobacter_baumannii      | HR = 3.58 (CI = 1.26-10.18; p = 0.017)      |
| Proteus_mirabilis/Escherichia_coli             | HR = 2.32 (CI = 0.94-5.71; p = 0.067)       |
| Proteus_mirabilis/Pseudomonas_aeruginosa       | HR = 1.68 (CI = 0.56-4.98; p = 0.353)       |
| Pseudomonas_aeruginosa/VRE                     | HR = 2.32 (CI = 0.55-9.8; p = 0.253)        |
| Pseudomonas_aeruginosa/MRSA                    | HR = 2.72 (CI = 0.96-7.67; p = 0.059)       |
| Pseudomonas_aeruginosa/Acinetobacter_baumannii | HR = 2.01 (CI = 0.26-15.32; p = 0.499)      |
| Pseudomonas_aeruginosa/Escherichia_coli        | HR = 2.66 (CI = 0.61-11.55; p = 0.193)      |
| Pseudomonas_aeruginosa/Proteus_mirabilis       | HR = 4.13 (CI = 1.41-12.07; p = 0.01)       |

*Supplemental Table 4*

The hazard ratio of acquiring a resistant organism upon antibiotic exposure within 30 days (row name: acquired organism/antibiotic), unadjusted for resident-level covariates. Species/antibiotic pair that have a hazard ratio > 2 and p value < 0.05 are highlighted.

| <b>Organism/antibiotic exposed</b>      | <b>Hazard ratio (confidence interval; p value)</b> |
|-----------------------------------------|----------------------------------------------------|
| VRE/Aminoglycosides                     | HR = 5.66 (CI = 2.28-14.03; p < 0.001)             |
| VRE/Carbapenems                         | HR = 2.24 (CI = 0.3-16.75; p = 0.433)              |
| VRE/Cephalosporins                      | HR = 2.4 (CI = 1.13-5.09; p = 0.022)               |
| VRE/Glycopeptides                       | HR = 6.26 (CI = 2.98-13.14; p < 0.001)             |
| VRE/Lincosamides                        | HR = 3.84 (CI = 0.5-29.73; p = 0.197)              |
| VRE/Macrolides                          | HR = 1.46 (CI = 0.2-10.76; p = 0.712)              |
| VRE/Nitrofurans                         | HR = 3.33 (CI = 1-11.15; p = 0.051)                |
| VRE/Oxazolidinones                      | HR = 1.54 (CI = 0.21-11.5; p = 0.672)              |
| VRE/Penicillins                         | HR = 0.66 (CI = 0.09-4.89; p = 0.683)              |
| VRE/Penicillin Combinations             | HR = 1.89 (CI = 0.66-5.41; p = 0.238)              |
| VRE/Quinolones                          | HR = 1.83 (CI = 0.84-3.98; p = 0.127)              |
| VRE/Sulfonamides                        | HR = 0.73 (CI = 0.17-3.06; p = 0.662)              |
| VRE/Tetracyclines                       | HR = 2.83 (CI = 0.67-12.02; p = 0.158)             |
| VRE/Echinocandin                        | HR = 1 (CI = 1-1; p = NaN)                         |
| VRE/Glycylcycline                       | HR = 1 (CI = 1-1; p = NaN)                         |
| VRE/Monobactams                         | HR = 1 (CI = 1-1; p = NaN)                         |
| MRSA/Aminoglycosides                    | HR = 0.46 (CI = 0.06-3.39; p = 0.45)               |
| MRSA/Carbapenems                        | HR = 2.09 (CI = 0.5-8.77; p = 0.315)               |
| MRSA/Cephalosporins                     | HR = 1.2 (CI = 0.55-2.6; p = 0.644)                |
| MRSA/Glycopeptides                      | HR = 0.95 (CI = 0.37-2.42; p = 0.91)               |
| MRSA/Nitrofurans                        | HR = 1.25 (CI = 0.3-5.21; p = 0.76)                |
| MRSA/Nitroimidazoles                    | HR = 0.96 (CI = 0.23-3.98; p = 0.95)               |
| MRSA/Penicillins                        | HR = 1.75 (CI = 0.54-5.73; p = 0.353)              |
| MRSA/Penicillin Combinations            | HR = 1.87 (CI = 0.78-4.45; p = 0.16)               |
| MRSA/Quinolones                         | HR = 1.01 (CI = 0.47-2.17; p = 0.984)              |
| MRSA/Sulfonamides                       | HR = 0.83 (CI = 0.26-2.69; p = 0.756)              |
| MRSA/Tetracyclines                      | HR = 0.83 (CI = 0.11-6.04; p = 0.85)               |
| MRSA/Echinocandin                       | HR = 1 (CI = 1-1; p = NaN)                         |
| MRSA/Glycylcycline                      | HR = 1 (CI = 1-1; p = NaN)                         |
| Acinetobacter_baumannii/Aminoglycosides | HR = 5.73 (CI = 1.62-20.24; p = 0.007)             |
| Acinetobacter_baumannii/Carbapenems     | HR = 4.84 (CI = 0.63-37.02; p = 0.128)             |
| Acinetobacter_baumannii/Cephalosporins  | HR = 2.06 (CI = 0.73-5.84; p = 0.175)              |
| Acinetobacter_baumannii/Glycopeptides   | HR = 3.43 (CI = 1.21-9.7; p = 0.02)                |
| Acinetobacter_baumannii/Nitrofurans     | HR = 1.63 (CI = 0.22-12.4; p = 0.635)              |

|                                                 |                                        |
|-------------------------------------------------|----------------------------------------|
| Acinetobacter_baumannii/Nitroimidazoles         | HR = 1.33 (CI = 0.18-10.15; p = 0.78)  |
| Acinetobacter_baumannii/Oxazolidinones          | HR = 2.54 (CI = 0.33-19.59; p = 0.37)  |
| Acinetobacter_baumannii/Penicillins             | HR = 1.08 (CI = 0.14-8.17; p = 0.94)   |
| Acinetobacter_baumannii/Penicillin Combinations | HR = 0.8 (CI = 0.11-6.02; p = 0.825)   |
| Acinetobacter_baumannii/Quinolones              | HR = 0.84 (CI = 0.24-2.94; p = 0.789)  |
| Acinetobacter_baumannii/Sulfonamides            | HR = 0.62 (CI = 0.08-4.72; p = 0.649)  |
| Acinetobacter_baumannii/Echinocandin            | HR = 1 (CI = 1-1; p = NaN)             |
| Acinetobacter_baumannii/Glycylcycline           | HR = 1 (CI = 1-1; p = NaN)             |
| Escherichia_coli/Aminoglycosides                | HR = 3.79 (CI = 1.09-13.2; p = 0.036)  |
| Escherichia_coli/Carbapenems                    | HR = 1.78 (CI = 0.24-13.29; p = 0.576) |
| Escherichia_coli/Cephalosporins                 | HR = 1.56 (CI = 0.58-4.24; p = 0.379)  |
| Escherichia_coli/Glycopeptides                  | HR = 2.07 (CI = 0.76-5.63; p = 0.155)  |
| Escherichia_coli/Nitroimidazoles                | HR = 0.77 (CI = 0.1-5.77; p = 0.802)   |
| Escherichia_coli/Oxazolidinones                 | HR = 3.71 (CI = 0.49-28.03; p = 0.203) |
| Escherichia_coli/Penicillins                    | HR = 3.1 (CI = 0.91-10.6; p = 0.072)   |
| Escherichia_coli/Penicillin Combinations        | HR = 1.18 (CI = 0.28-5.09; p = 0.82)   |
| Escherichia_coli/Quinolones                     | HR = 1.8 (CI = 0.73-4.44; p = 0.2)     |
| Escherichia_coli/Sulfonamides                   | HR = 0.47 (CI = 0.06-3.5; p = 0.461)   |
| Escherichia_coli/Tetracyclines                  | HR = 1.59 (CI = 0.21-11.84; p = 0.652) |
| Escherichia_coli/Echinocandin                   | HR = 1 (CI = 1-1; p = NaN)             |
| Escherichia_coli/Glycylcycline                  | HR = 1 (CI = 1-1; p = NaN)             |
| Proteus_mirabilis/Aminoglycosides               | HR = 3.54 (CI = 1.05-11.94; p = 0.041) |
| Proteus_mirabilis/Cephalosporins                | HR = 2.35 (CI = 1.06-5.22; p = 0.036)  |
| Proteus_mirabilis/Glycopeptides                 | HR = 1.11 (CI = 0.33-3.75; p = 0.861)  |
| Proteus_mirabilis/Nitrofurans                   | HR = 8.95 (CI = 3.69-21.72; p < 0.001) |
| Proteus_mirabilis/Penicillins                   | HR = 1.95 (CI = 0.45-8.39; p = 0.369)  |
| Proteus_mirabilis/Penicillin Combinations       | HR = 0.46 (CI = 0.06-3.44; p = 0.452)  |
| Proteus_mirabilis/Quinolones                    | HR = 1.06 (CI = 0.43-2.64; p = 0.902)  |
| Proteus_mirabilis/Sulfonamides                  | HR = 1.26 (CI = 0.38-4.19; p = 0.711)  |
| Proteus_mirabilis/Echinocandin                  | HR = 1 (CI = 1-1; p = NaN)             |
| Proteus_mirabilis/Glycylcycline                 | HR = 1 (CI = 1-1; p = NaN)             |
| Pseudomonas_aeruginosa/Aminoglycosides          | HR = 7.17 (CI = 1.97-26.16; p = 0.003) |
| Pseudomonas_aeruginosa/Carbapenems              | HR = 10.88 (CI = 3-39.49; p < 0.001)   |
| Pseudomonas_aeruginosa/Cephalosporins           | HR = 0.81 (CI = 0.18-3.63; p = 0.787)  |
| Pseudomonas_aeruginosa/Glycopeptides            | HR = 4.73 (CI = 1.58-14.19; p = 0.006) |
| Pseudomonas_aeruginosa/Nitrofurans              | HR = 1.3 (CI = 0.17-10.11; p = 0.804)  |
| Pseudomonas_aeruginosa/Oxazolidinones           | HR = 7.62 (CI = 1.66-35.11; p = 0.009) |
| Pseudomonas_aeruginosa/Penicillin               | HR = 0.87 (CI = 0.11-6.69; p = 0.897)  |

| Combinations                         |                                       |
|--------------------------------------|---------------------------------------|
| Pseudomonas_aeruginosa/Quinolones    | HR = 1.23 (CI = 0.34-4.41; p = 0.756) |
| Pseudomonas_aeruginosa/Sulfonamides  | HR = 0.8 (CI = 0.1-6.13; p = 0.83)    |
| Pseudomonas_aeruginosa/Echinocandin  | HR = 1 (CI = 1-1; p = NaN)            |
| Pseudomonas_aeruginosa/Glycylcycline | HR = 1 (CI = 1-1; p = NaN)            |



**Microbial and antibiotic interactions in nursing homes**

Wang *et al.*

Supplemental Table 5

Hazard ratios used for constructing interaction network showing association between risk factors and colonization (Figure 2). \*\*  $p < 0.05$ .

| VRE                 | Hazard ratio | p-value  |
|---------------------|--------------|----------|
| Aminoglycosides     | 2.30e+00     | 1.59e-01 |
| Cephalosporins      | 1.31e+00     | 5.90e-01 |
| Glycopeptides**     | 5.94e+00     | 9.00e-04 |
| Nitrofurans         | 2.38e+00     | 2.66e-01 |
| Proteus mirabilis** | 5.79e+00     | 1.00e-04 |
| Sex                 | 1.07e+00     | 8.78e-01 |

| Acinetobacter baumannii | Hazard ratio | p-value  |
|-------------------------|--------------|----------|
| Aminoglycosides **      | 6.43e+00     | 1.45e-02 |
| Glycopeptides           | 2.64e+00     | 1.30e-01 |
| VRE**                   | 5.50e+00     | 1.90e-03 |
| Proteus mirabilis**     | 5.03e+00     | 3.70e-03 |
| Sex                     | 1.14e+00     | 8.20e-01 |

| Escherichia coli  | Hazard ratio | p-value  |
|-------------------|--------------|----------|
| Aminoglycosides   | 3.15e+00     | 8.12e-02 |
| Penicillins**     | 4.52e+00     | 2.54e-02 |
| Proteus mirabilis | 2.17e+00     | 8.61e-02 |
| Sex               | 7.21e-01     | 4.41e-01 |

| Proteus mirabilis         | Hazard ratio | p-value  |
|---------------------------|--------------|----------|
| Aminoglycosides           | 1.72e+00     | 4.17e-01 |
| Cephalosporins            | 1.31e+00     | 5.37e-01 |
| Nitrofurans**             | 8.98e+00     | 0.00e+00 |
| Acinetobacter baumannii** | 1.13e+01     | 0.00e+00 |
| Escherichia coli          | 1.82e+00     | 1.47e-01 |
| Pseudomonas aeruginosa**  | 3.25e+00     | 4.69e-02 |
| Sex                       | 1.46e+00     | 3.51e-01 |

| Pseudomonas aeruginosa | Hazard ratio | p-value  |
|------------------------|--------------|----------|
| Aminoglycosides **     | 5.68e+00     | 1.25e-02 |
| Carbapenems**          | 7.33e+00     | 3.04e-02 |
| Glycopeptides          | 1.16e+00     | 8.52e-01 |
| Oxazolidinones         | 2.49e+00     | 3.43e-01 |
| VRE**                  | 3.79e+00     | 2.21e-02 |
| Sex                    | 1.12e+00     | 8.42e-01 |

| MRSA                     | Hazard ratio | p-value  |
|--------------------------|--------------|----------|
| Escherichia coli**       | 2.33e+00     | 3.29e-02 |
| Proteus mirabilis**      | 3.32e+00     | 1.80e-03 |
| Pseudomonas aeruginosa** | 3.42e+00     | 4.71e-02 |
| Sex                      | 2.54e+00     | 2.30e-02 |

4 *Supplemental Table 6*  
 5 Risk of having positive urine culture when mono-colonized and co-colonized (Figure 3). \*  $p <$   
 6 0.1.  
 7

| <b>MRSA in urine</b>    | Hazard ratio | p-value  |
|-------------------------|--------------|----------|
| MRSA colonization alone | 2.70e+00     | 2.33e-01 |
| Any other MDROs         | 2.08e-01     | 1.39e-01 |
| Both                    | 1.75e+00     | 4.89e-01 |
| Functional status       | 1.07e+00     | 3.65e-01 |
| Sex                     | 1.98e+00     | 2.72e-01 |

| <b>MRSA in urine</b>                 | Hazard ratio | p-value  |
|--------------------------------------|--------------|----------|
| MRSA colonization                    | 2.63e+00     | 1.73e-01 |
| <i>Escherichia coli</i> colonization | 7.04e-01     | 7.46e-01 |
| Both                                 | 3.94e+00     | 2.34e-01 |
| Functional status                    | 1.08e+00     | 3.39e-01 |
| Sex                                  | 2.00e+00     | 2.78e-01 |

| <b>MRSA in urine</b>                  | Hazard ratio | p-value  |
|---------------------------------------|--------------|----------|
| MRSA colonization                     | 2.05e+00     | 3.78e-01 |
| <i>Proteus mirabilis</i> colonization | 7.32e-01     | 7.75e-01 |
| Both*                                 | 4.84e+00     | 6.60e-02 |
| Functional status                     | 1.07e+00     | 3.79e-01 |
| Sex                                   | 1.94e+00     | 2.96e-01 |

8

| <b><i>E. coli</i> in urine</b>             | Hazard ratio | p-value  |
|--------------------------------------------|--------------|----------|
| <i>Escherichia coli</i> colonization alone | 6.12e-01     | 6.50e-01 |
| Any other MDROs                            | 1.01e+00     | 9.86e-01 |
| Both                                       | 2.53e+00     | 1.24e-01 |
| Functional status                          | 1.05e+00     | 4.67e-01 |
| Sex                                        | 6.75e-01     | 4.55e-01 |

| <b><i>E. coli</i> in urine</b>       | Hazard ratio | p-value  |
|--------------------------------------|--------------|----------|
| MRSA colonization                    | 9.36e-01     | 9.51e-01 |
| <i>Escherichia coli</i> colonization | 1.73e+00     | 3.18e-01 |
| Both                                 | 9.78e-01     | 9.84e-01 |
| Functional status                    | 1.06e+00     | 3.95e-01 |

|     |          |          |
|-----|----------|----------|
| Sex | 6.77e-01 | 4.71e-01 |
|-----|----------|----------|

9

| <b><i>E. coli</i> in urine</b>        | Hazard ratio | p-value  |
|---------------------------------------|--------------|----------|
| <i>Escherichia coli</i> colonization  | 1.32e+00     | 7.05e-01 |
| <i>Proteus mirabilis</i> colonization | 1.92e+00     | 3.18e-01 |
| Both*                                 | 3.11e+00     | 9.81e-02 |
| Functional status                     | 1.05e+00     | 4.42e-01 |
| Sex                                   | 7.06e-01     | 5.08e-01 |

| <b>VRE in urine</b>    | Hazard ratio | p-value  |
|------------------------|--------------|----------|
| VRE colonization alone | 6.40e-01     | 7.05e-01 |
| Any other MDROs        | 3.94e-01     | 1.59e-01 |
| Both                   | 1.06e+00     | 9.31e-01 |
| Functional status      | 1.13e+00     | 1.20e-01 |
| Sex                    | 1.49e+00     | 5.44e-01 |

| <b>VRE in urine</b>                  | Hazard ratio | p-value  |
|--------------------------------------|--------------|----------|
| <i>Escherichia coli</i> colonization | 3.90e-01     | 2.68e-01 |
| VRE colonization                     | 3.38e-01     | 3.21e-01 |
| Both*                                | 4.04e+00     | 6.23e-02 |
| Functional status                    | 1.12e+00     | 1.12e-01 |
| Sex                                  | 1.43e+00     | 5.44e-01 |

10

| <b>VRE in urine</b>                   | Hazard ratio | p-value  |
|---------------------------------------|--------------|----------|
| VRE colonization                      | 1.38e+00     | 6.51e-01 |
| <i>Proteus mirabilis</i> colonization | 9.12e-02     | 5.12e-02 |
| Both                                  | 4.28e-01     | 4.86e-01 |
| Functional status                     | 1.16e+00     | 7.07e-02 |
| Sex                                   | 1.49e+00     | 5.46e-01 |

| <b><i>P. mirabilis</i> in urine</b>         | Hazard ratio | p-value  |
|---------------------------------------------|--------------|----------|
| <i>Proteus mirabilis</i> colonization alone | 1.22e+00     | 7.42e-01 |
| Any other MDROs                             | 6.49e-01     | 3.54e-01 |
| Both                                        | 1.72e+00     | 2.39e-01 |
| Functional status                           | 1.00e+00     | 9.47e-01 |
| Sex                                         | 2.26e+00     | 5.34e-02 |

| <b><i>P. mirabilis</i> in urine</b>   | Hazard ratio | p-value  |
|---------------------------------------|--------------|----------|
| MRSA colonization                     | 1.09e+00     | 8.90e-01 |
| <i>Proteus mirabilis</i> colonization | 1.52e+00     | 3.35e-01 |
| Both                                  | 2.68e+00     | 1.10e-01 |
| Functional status                     | 1.01e+00     | 8.63e-01 |
| Sex                                   | 2.07e+00     | 8.50e-02 |

| <b><i>P. mirabilis</i> in urine</b>   | Hazard ratio | p-value  |
|---------------------------------------|--------------|----------|
| <i>Escherichia coli</i> colonization  | 8.15e-01     | 7.28e-01 |
| <i>Proteus mirabilis</i> colonizatoin | 2.05e+00     | 9.45e-02 |
| Both                                  | 9.51e-01     | 9.42e-01 |
| Functional status                     | 1.01e+00     | 9.23e-01 |
| Sex                                   | 2.07e+00     | 8.62e-02 |

| <b><i>P. mirabilis</i> in urine</b>   | Hazard ratio | p-value  |
|---------------------------------------|--------------|----------|
| VRE colonization                      | 3.05e-01     | 2.55e-01 |
| <i>Proteus mirabilis</i> colonization | 1.36e+00     | 4.96e-01 |
| Both                                  | 2.30e+00     | 1.41e-01 |
| Functional status                     | 1.00e+00     | 9.36e-01 |
| Sex                                   | 2.23e+00     | 5.61e-02 |

11

12

13 *Supplemental Figure 1*  
 14 Distribution of MDRO colonization and species-specific CAUTI across different facilities in this  
 15 study. Control facilities are indicated as “C” and intervention facilities are indicated as “I” in  
 16 brackets.  
 17

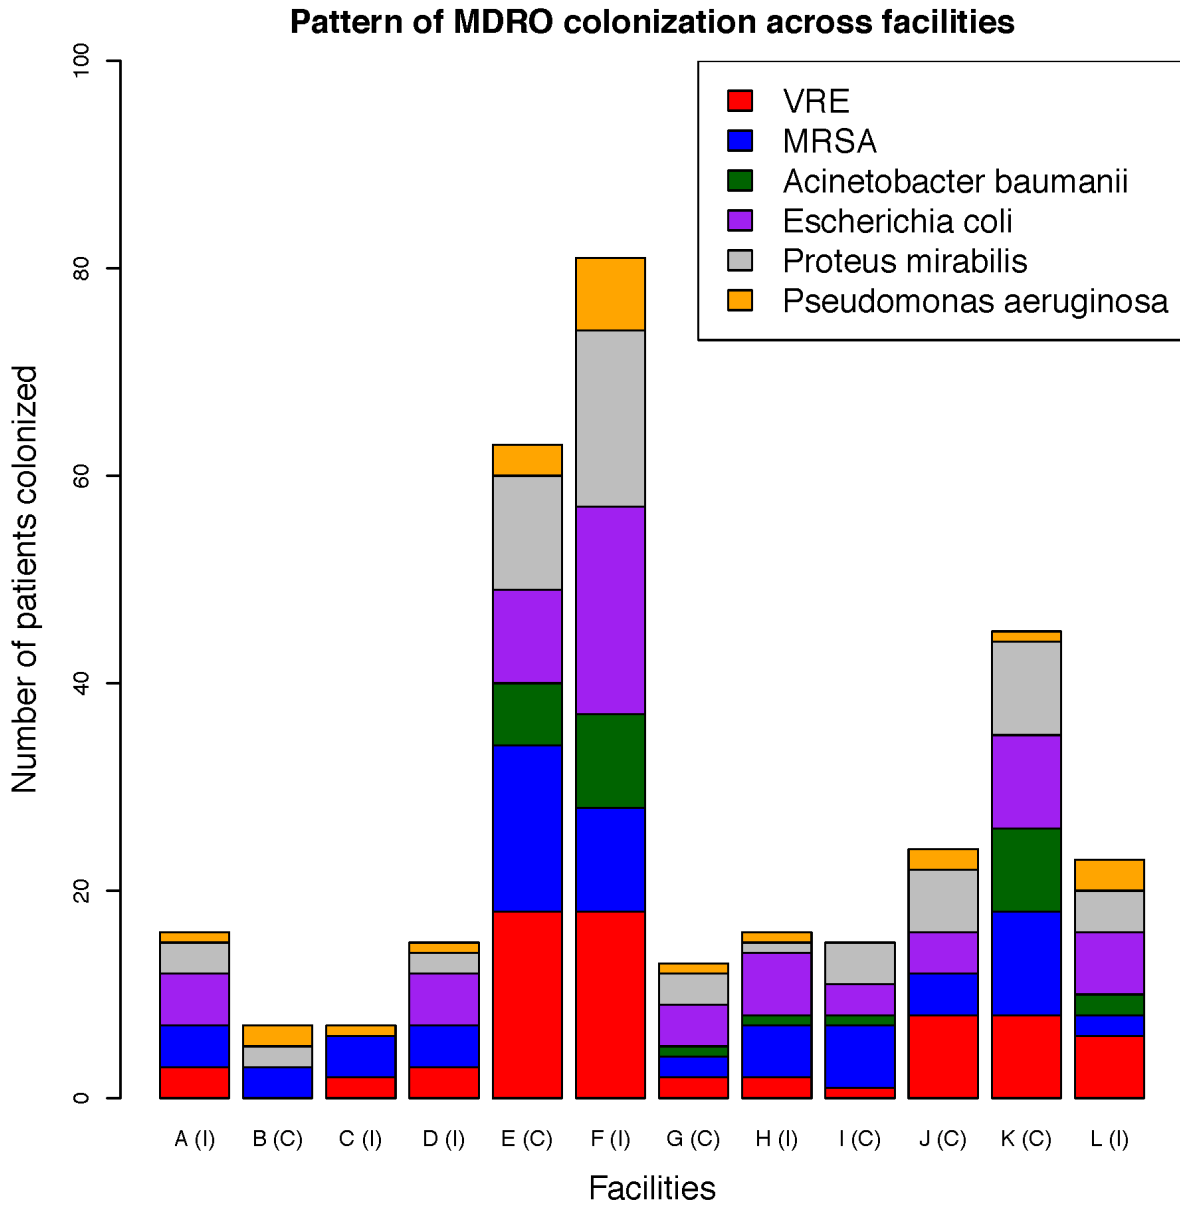

18

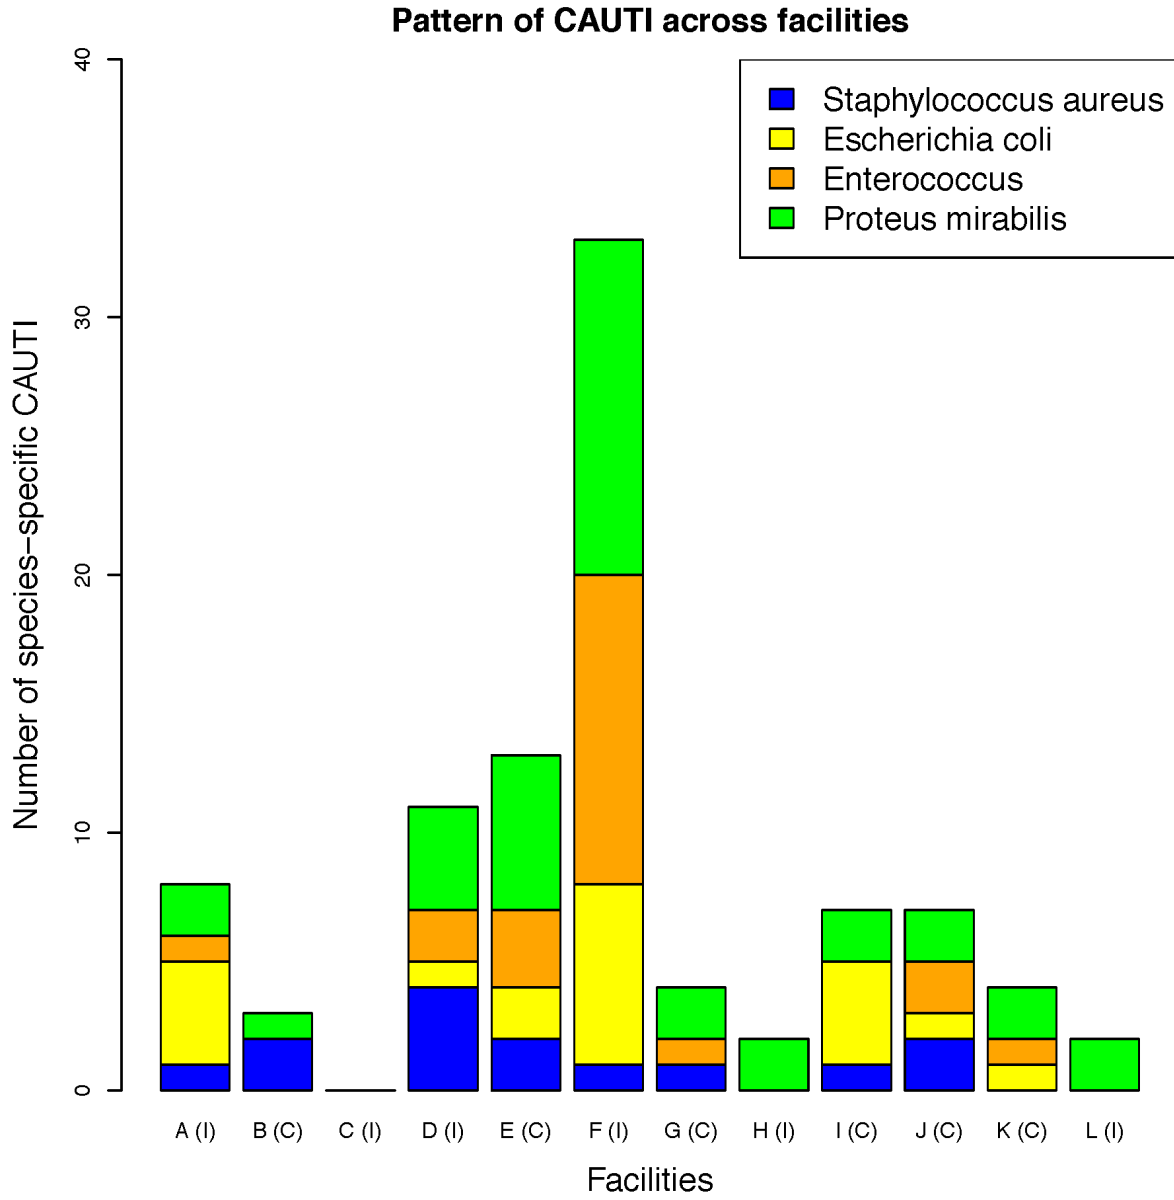

19  
20

21 *Supplemental Figure 2*

22 Co-occurrence network constructed using EcoSimR. The number of occurrences of particular  
 23 species pairs colonizing the same patient (rectal and groin areas) was compared to 1000  
 24 randomized matrices where the presence of each species is shuffled across patients and the  
 25 number of bacteria in each patient harbors is fixed (“sim9” algorithm). Circles represent  
 26 bacterial species and lines between two circles indicate that these species are found to co-  
 27 colonize in more than five patients. Red lines indicate aggregation, green lines indicate  
 28 segregation, grey lines indicate random co-occurrence. The thickness of the lines corresponds to  
 29 the number of patients in which species pairs are found. All interactions shown have  $p < 0.1$ .  
 30

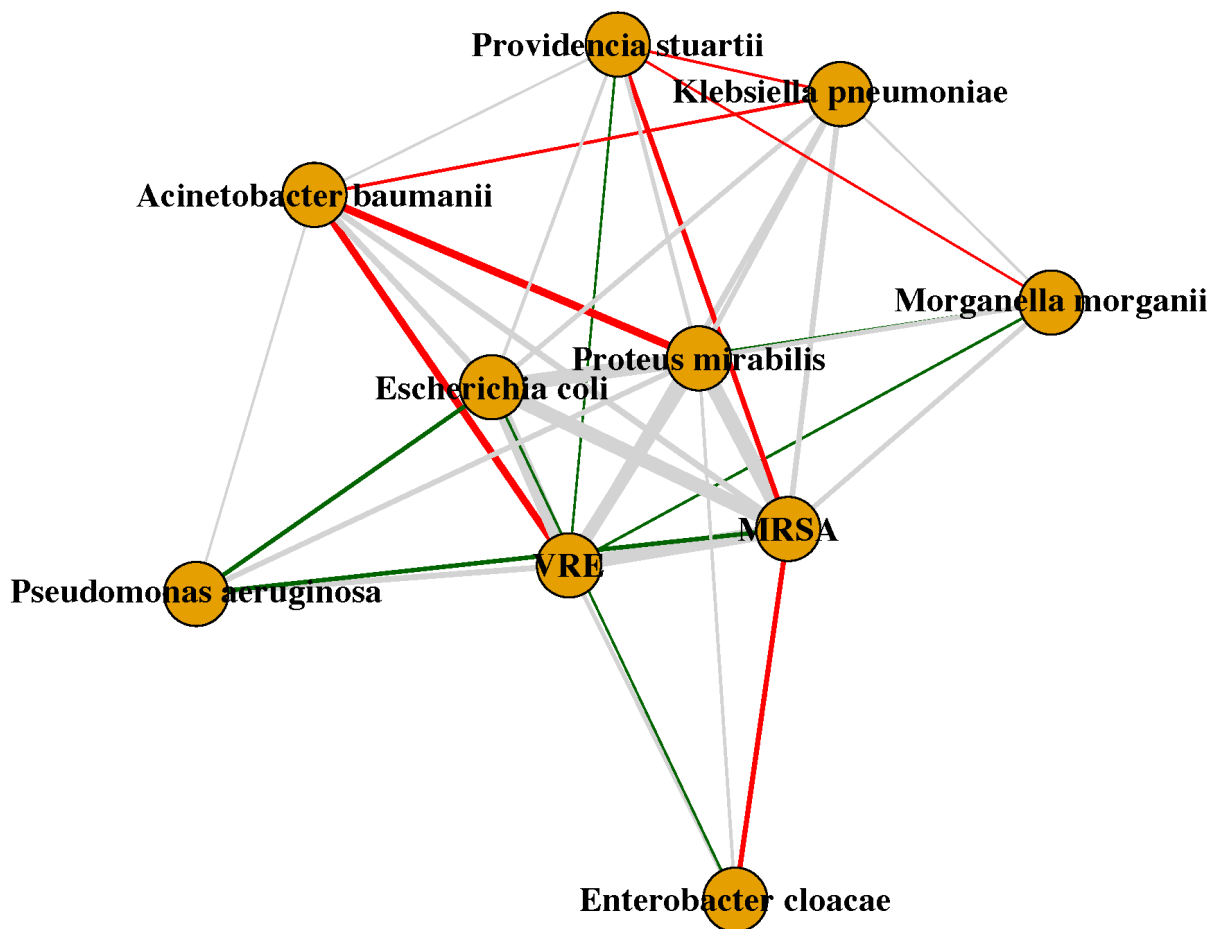

31  
32

33 *Supplemental Figure 3*

34 Four possible scenarios of treating colonization as a time-varying variable. Blue: Species A; red:  
 35 Species B; filled circle: primary colonization; X: secondary colonization; open circle: no  
 36 secondary colonization; dashed line: assumed duration of colonization. A) Species A is detected  
 37 at Visit N, and is assumed to persist until Visit N + 1. Species B is detected at Visit N + 1.  
 38 Species A may be a risk factor for Species B colonization. B) Species A is detected at Visit N,  
 39 and is assumed to persist until Visit N + 1. Species A is absent at Visit N + 1, and is assumed  
 40 to be absent until Visit N + 2. Species B is found at Visit N + 2. Species A does not predict Species  
 41 B colonization. C) Species A is detected at Visit N and is assumed to persist until Visit N + 1.  
 42 Species B is detected prior to Visit N. Species A does not predict Species B colonization. D)  
 43 Species A is detected at Visits N, N + 1, and N + 2, and is assumed to persist until the next visit.  
 44 Species B is not detected before the end of the study. Species A does not predict Species B  
 45 colonization.

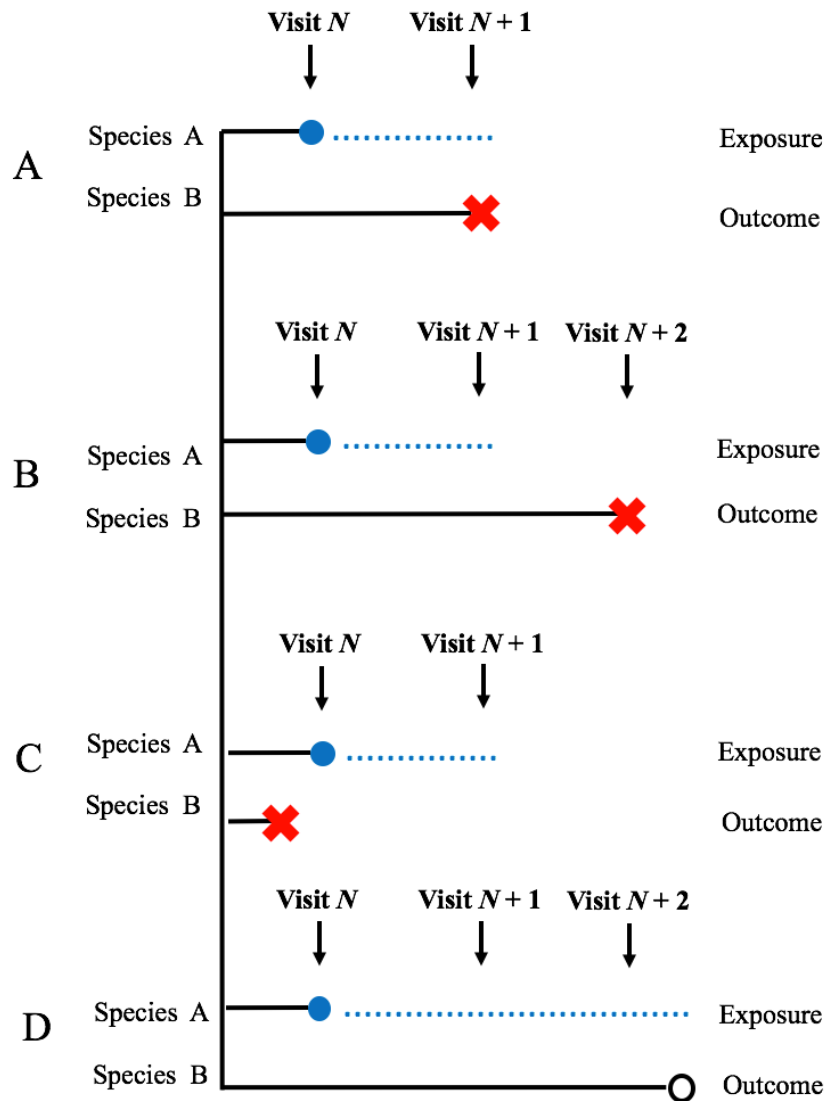

47  
48



49 *Supplemental Figure 4*

50 Four possible scenarios of treating antibiotic exposure as a time-varying variable. Green filled  
 51 circle: start and end of antibiotic administration; black X: bacterial colonization; open circle: no  
 52 colonization; dashed line: assumed prolonged effects after antibiotic exposure. A) Antibiotic is  
 53 administered and the perturbation (on host microbiota, selective pressure, etc.) lasts for 30 days.  
 54 ARO is detected at the end of the 30 days. The antibiotic is a risk factor for ARO colonization. B)  
 55 Antibiotic is administered and the perturbation lasts for 30 days. ARO is detected after the 30  
 56 day period. The antibiotic does not predict ARO colonization. C) ARO colonization occurs  
 57 before antibiotic administration. The antibiotic does not predict ARO colonization. D) Antibiotic  
 58 is administered and the perturbation lasts for 30 days. No ARO colonization is detected before  
 59 the end of the study. The antibiotic does not predict ARO colonization.

60

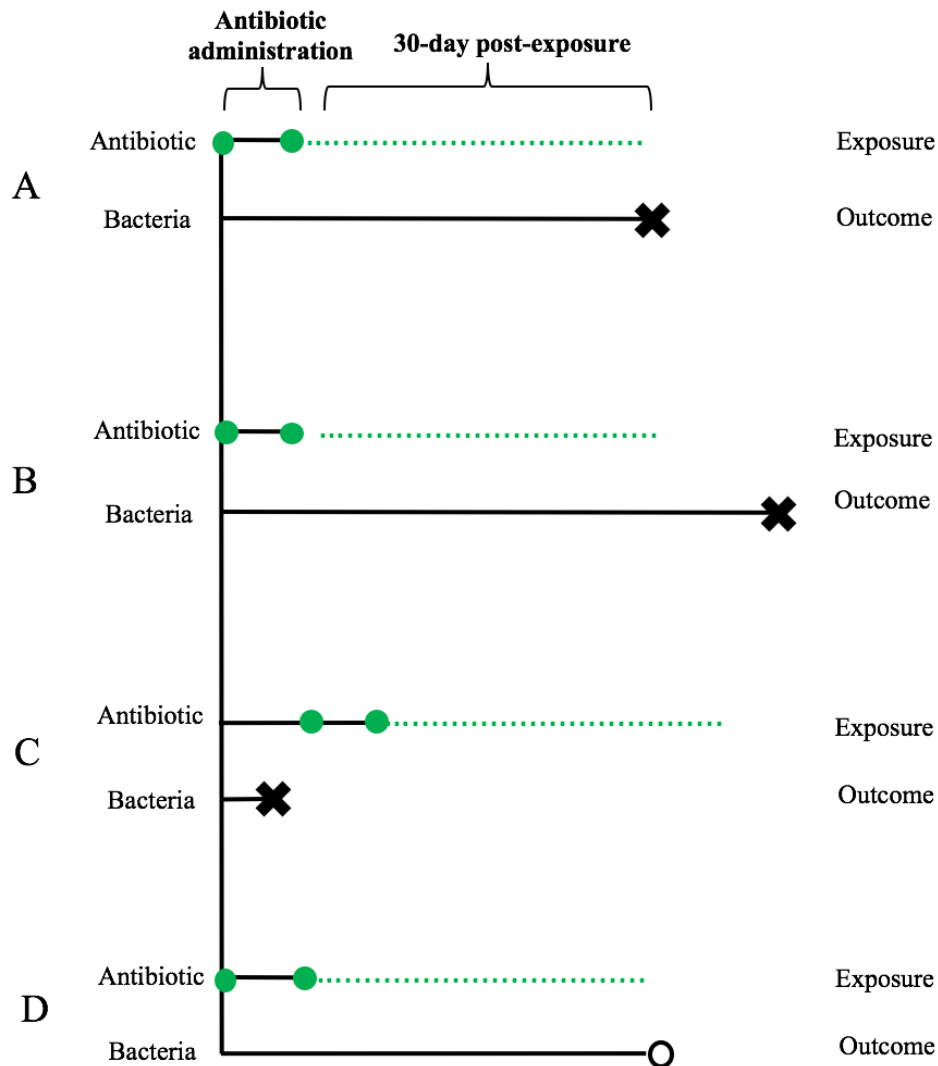

61

62

63 *Supplemental Figure 5*

64 Fractions of cases where colonizing MDROs were found to be associated with species-specific  
 65 CAUTI. Body sites consist of the groin and peri-rectum. *x*-axis labels indicate the fraction of  
 66 cases where the organism causing the CAUTI was present alone (mono), or occurring with other  
 67 organisms. We observed higher co-occurrence frequency in organisms that were found to have  
 68 interactions in our Cox regression model. We hypothesize that the absence of the potentially  
 69 CAUTI-causing organisms was due to: 1. colonization abundance below the level of detection; 2.  
 70 colonization by susceptible strains; 3. undetected transmission between visits.

**Staphylococcus aureus in urine (total = 13)**  
**Absence of CAUTI spp on body sites = 9**

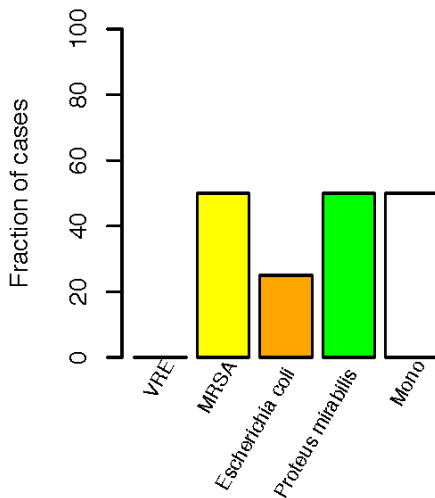

**Escherichia coli in urine (total = 20)**  
**Absence of CAUTI spp on body sites = 13**

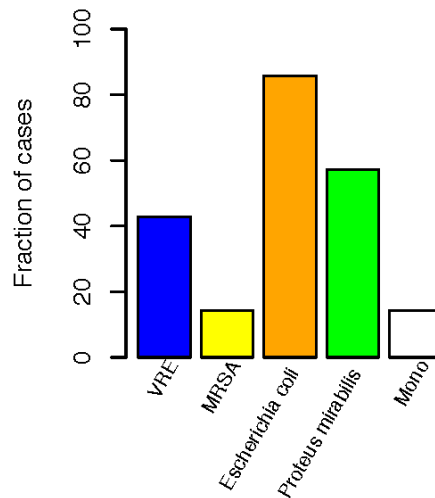

**Enterococcus in urine (total = 22)**  
**Absence of CAUTI spp on body sites = 17**

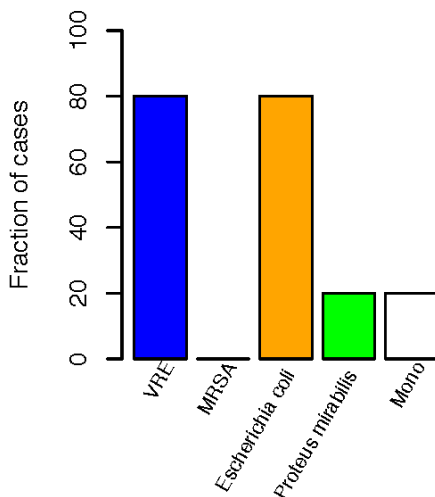

**Proteus mirabilis in urine (total = 38)**  
**Absence of CAUTI spp on body sites = 25**

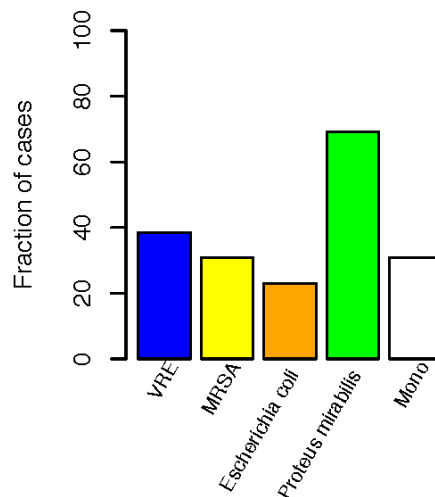

71  
 72
